# Supplementary material for: Self-Medication Practice and Associated Factors among Residents in Wuhan, China
Source: Int J Environ Res Public Health. 2018 Jan 4;15(1):68. doi: 10.3390/ijerph15010068 (PMC5800167; doi:10.3390/ijerph15010068)
Supplement: Supplementary file 1 [file ijerph-15-00068-s001.pdf]

**Table S1.** Variable names and measures

| Variable name                                  | Measure                                                                                                                                            |
|------------------------------------------------|----------------------------------------------------------------------------------------------------------------------------------------------------|
| <b>Dependent variable :</b><br>Self-medication | 1=Self-medication; 2=Non self-medication                                                                                                           |
| <b>Independent variable:</b><br>Age            | 1="18-20"; 2="21-40"; 3="41-60"; 4="≥60"                                                                                                           |
| Gender                                         | 1 = Male; 2 = Female                                                                                                                               |
| Occupation                                     | 1 = Worker; 2 = Peasant; 3 = Teacher; 4 = Civil servants;<br>5 = Medical staff; 6= small business owner; 7= Enterprise<br>staff; 8= Unemployed     |
| Marital status                                 | 1 = Married; 2 = Unmarried                                                                                                                         |
| Education                                      | 1 = Middle school and lower; 2 = High/Secondary School;<br>3 = College/University; 4 = Master and above;                                           |
| Monthly income<br>(Chinese Yuan)               | 1 = "<1500"; 2 = "1500-3000"; 3 = "3001-4500"<br>4 = "4501-6000"; 5 = ">6000"                                                                      |
| Medical insurance                              | 1 = Urban basic medical insurance; 2 = Free medical care;<br>3 = New cooperative medical scheme (NCMS);<br>4 = Commercial insurance; 5 = Uninsured |
| Distance to medical unit<br>(km)               | 1 = "<1"; 2 = "<2"; 3 = "<3"; 4 = "<4"; 5 = "≥4"                                                                                                   |
| Severity of disease                            | 1 = severe; 2 = common; 3 = mild                                                                                                                   |
| Length of illness (days)                       | 1 = "<3"; 2 = "<5"; 3 = "<7"; 4 = "≥7"                                                                                                             |
